# Supplementary material for: Exploring the Efficacy of Hydroxybenzoic Acid Derivatives in Mitigating Jellyfish Toxin-Induced Skin Damage: Insights into Protective and Reparative Mechanisms
Source: MDPI journal article supplement (doi:10.3390/md22050205), 2024-04-29
Supplement: s1 [file s1]

## Supplementary Materials:

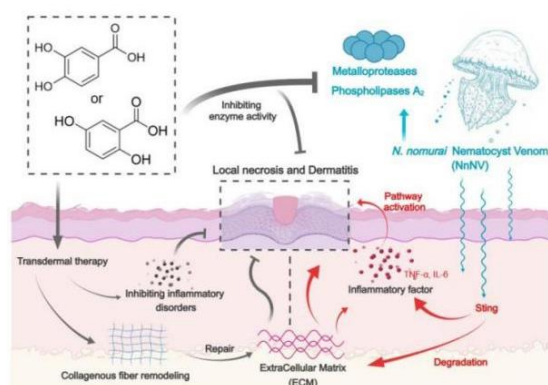

Graphical abstract

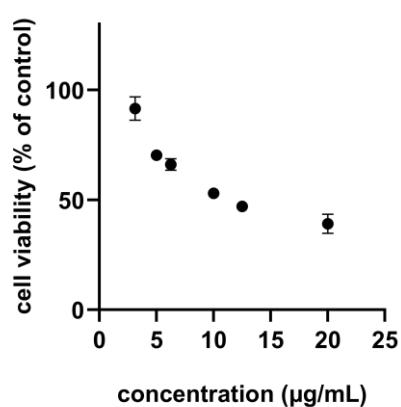

**Figure S1.** Cytotoxicity of NnNV at different concentrations on HaCaT cells. Determined an LC50 value of 11.91 µg/mL for NnNV based on cell survival. All results are representative of at least six independent experiments. Data are presented as mean  $\pm$  s.e.m. (n=6).
